# Supplementary figures and images for: Simulation based training versus non-simulation based training in anesthesiology: A meta-analysis of randomized controlled trials
Source: PubMed Central journal article supplement — Heliyon. 2023 Jul 13;9(8):e18249. doi: 10.1016/j.heliyon.2023.e18249 (PMC10412876; doi:10.1016/j.heliyon.2023.e18249), 2023-07-13

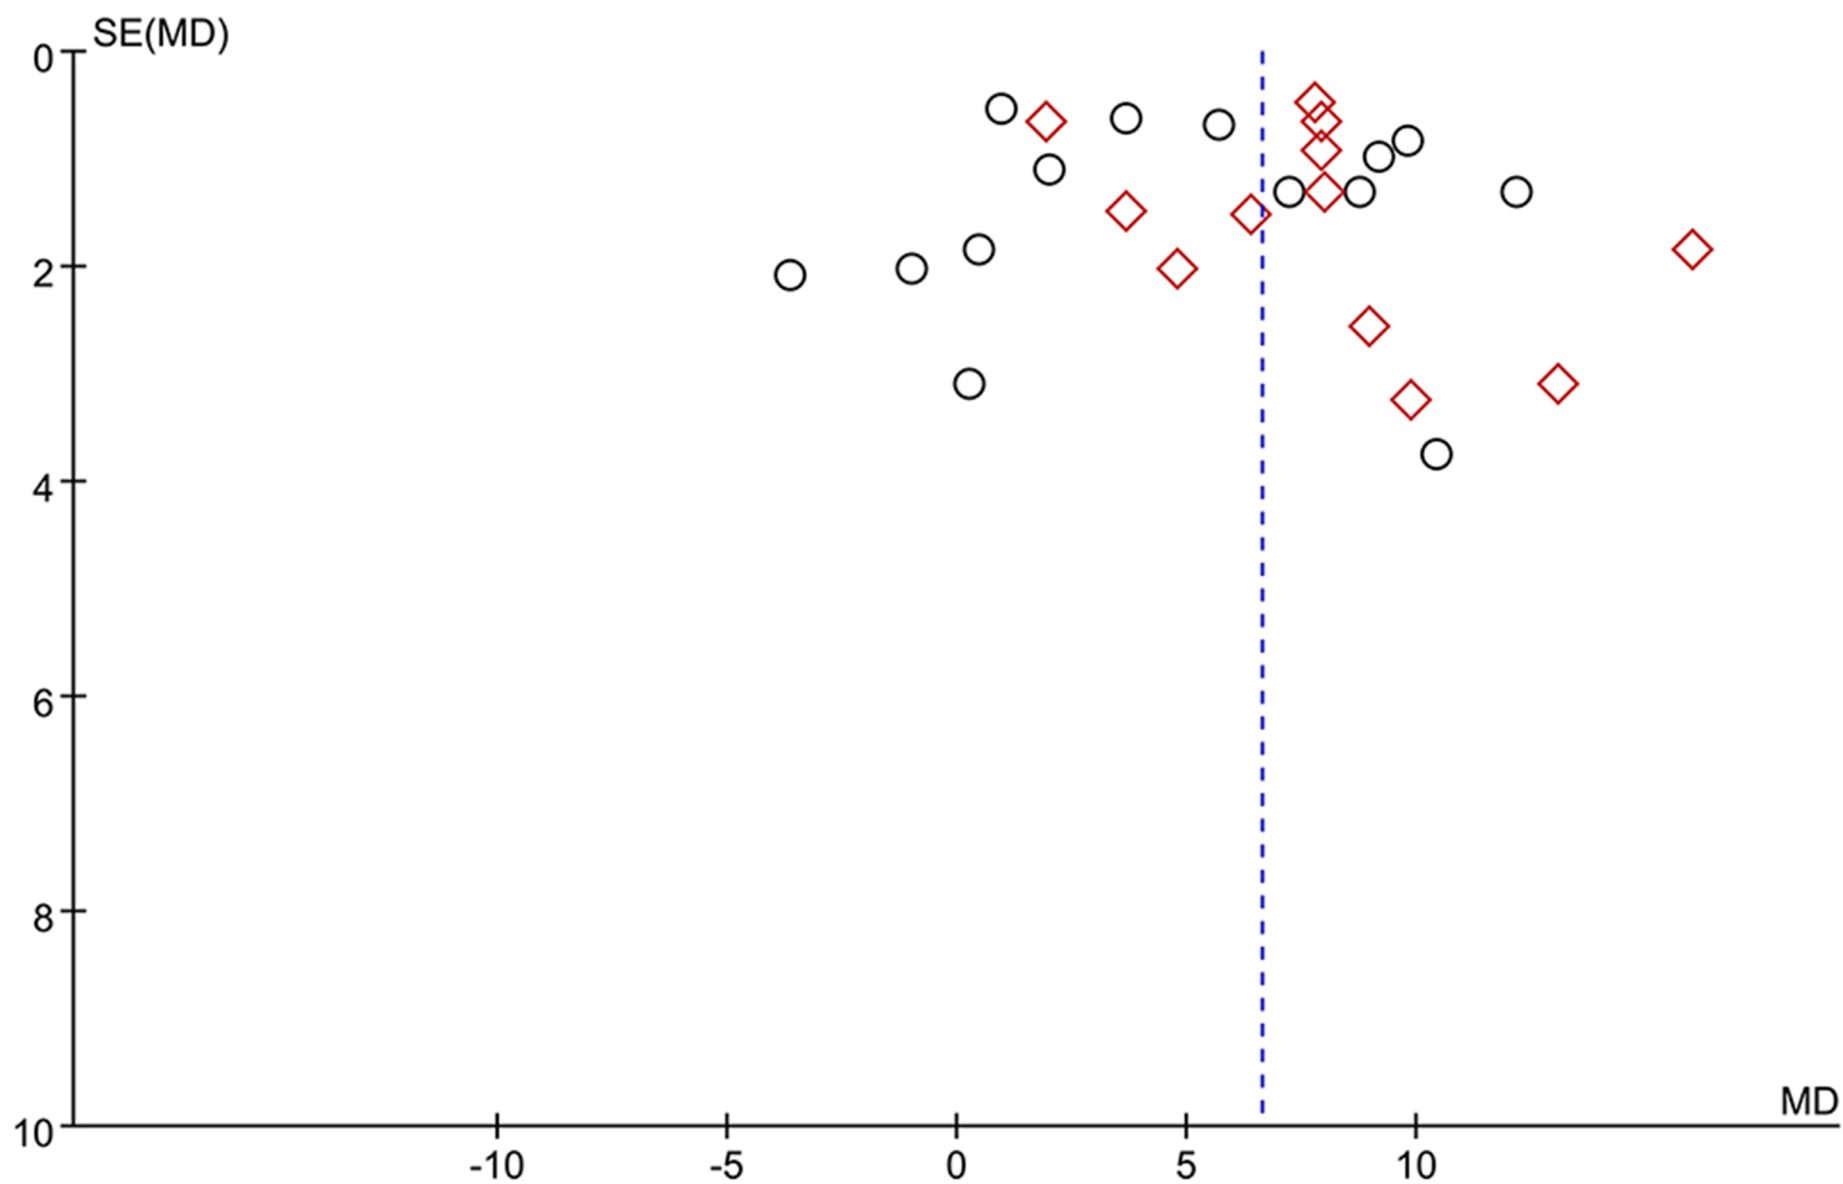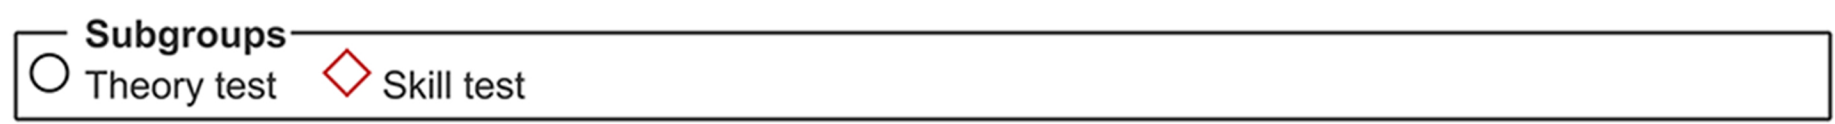

Supplement: mmc2.pdf [file mmc2.pdf]
